# Supplementary material for: Synthesis of photocatalytic cysteine-capped Cu≈10 clusters using Cu5 clusters as catalysts
Source: Royal Society of Chemistry journal article supplement (doi:10.1039/d2cp04550h), 2023-01-01
Supplement: d2cp04550h1.pdf [file d2cp04550h1.pdf]

**Supporting Information**

**Synthesis of Photocatalytic Cysteine- Capped Cu<sub>10</sub> Clusters in  
Water Using Small Cu<sub>5</sub> Clusters as Catalysts**

Shahana Huseyinova,<sup>a</sup> José M. Blanco Trillo,<sup>a</sup> José M. Ramallo-López,<sup>b</sup> Félix G. Requejo,<sup>b</sup> David Buceta,<sup>\*a</sup>  
and M. Arturo López-Quintela<sup>\*a</sup>.

---

<sup>a</sup>*Physical Chemistry Department, Faculty of Chemistry, and NANOMAG Laboratory, Research Technological Institute, University of Santiago de Compostela, E-15782 Santiago de Compostela, Spain.*

<sup>b</sup>*Instituto de Investigaciones Físicoquímicas Teóricas y Aplicadas – INIFTA (CONICET, UNLP), 1900 La Plata, Argentina.*

*Corresponding Authors\**

*M.A. López-Quintela (malopez.quintela@usc.es) and David Buceta (buceta.david@gmail.com)*

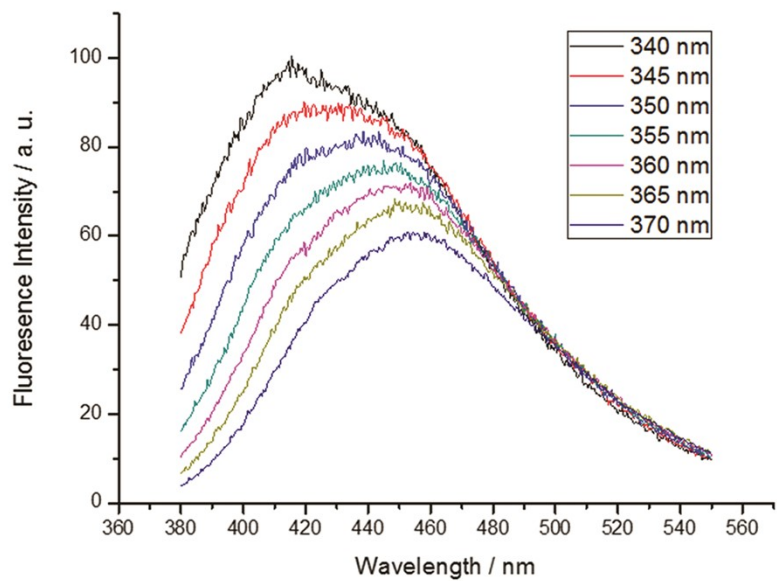

Fig. S 1: Excitation dependent emission (EDE) for a sample of Cu-Cys clusters in water under different excitation wavelengths, from 340 to 370 nm.

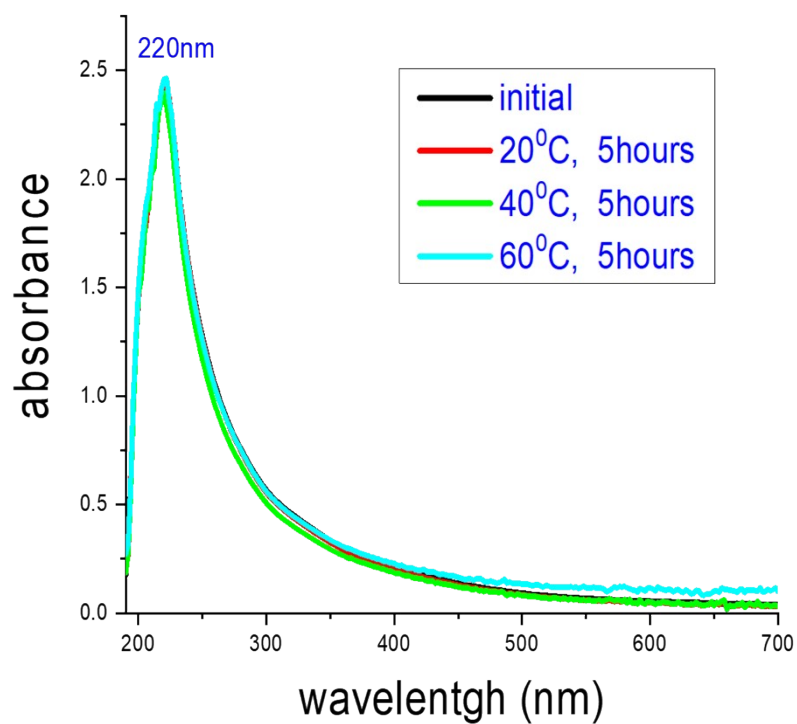

Fig. S 2: UV-vis spectra of a sample of Cu-Cys clusters at different temperatures

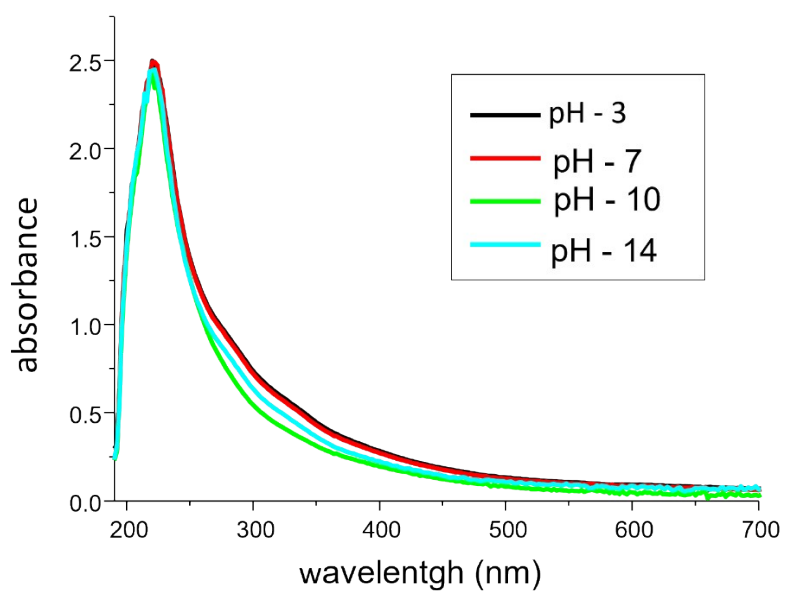

Fig. S 3: UV-Vis spectra of a sample of Cu-Cys clusters in water at different pHs

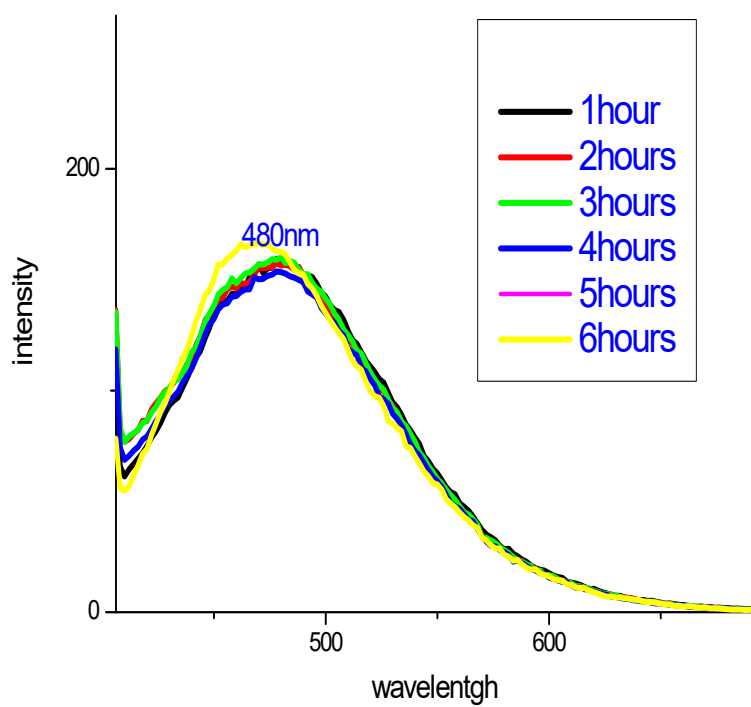

Fig. S 4: Photobleaching stability of a sample of Cu-cys clusters in water

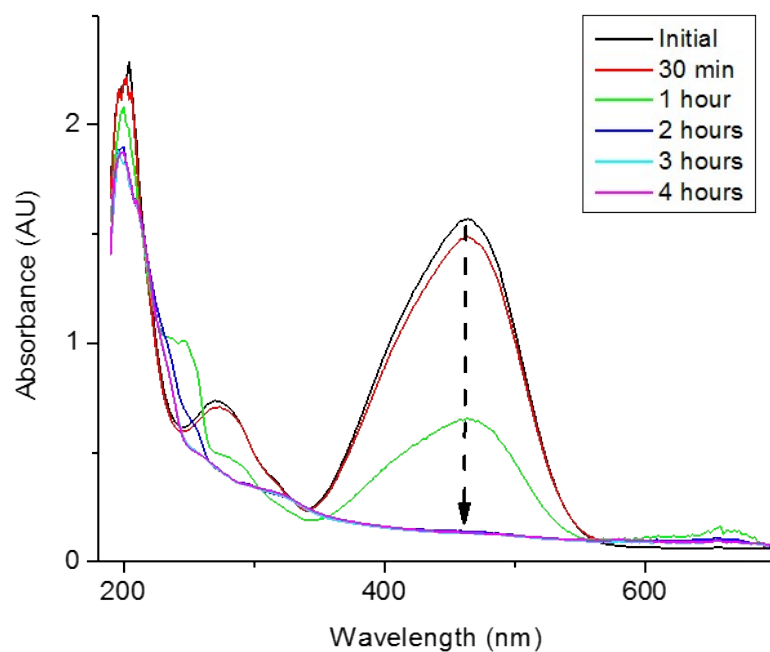

Fig. S 5: Change in the MO UV-Vis absorption spectrum after irradiation with visible light during four hours in the presence of Cu-cys clusters

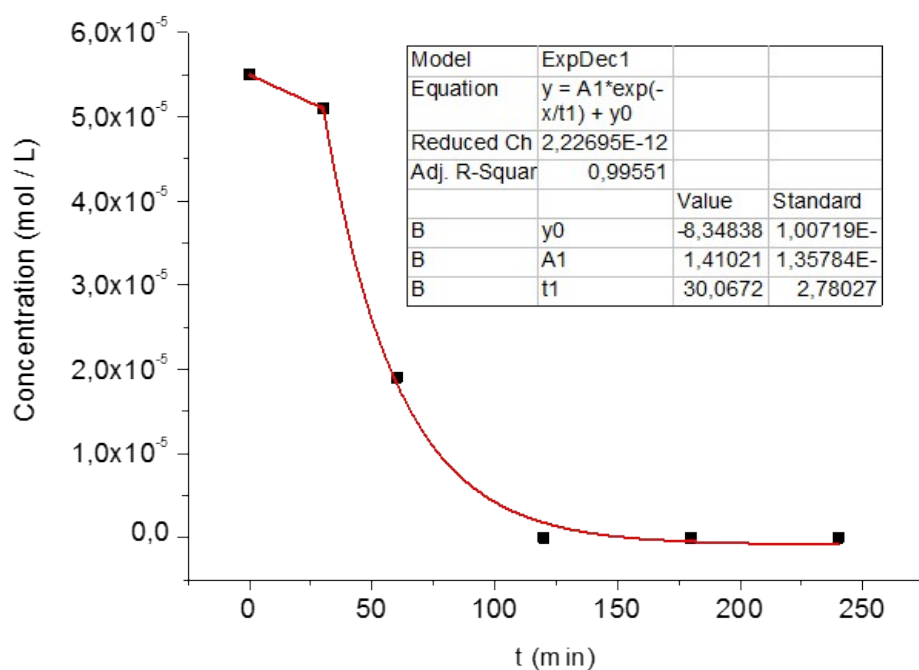

Fig. S 6: Removal rate for the photodegradation of MO after irradiation with visible light in the presence of Cu-cys clusters.  $[MO]_{initial} = 5.5 \times 10^{-5} M$ . Inset: statistical parameters. Note that at first the photodegradation is slower and one can consider that the reaction as such begins after the first 30 min. This is ascribed to an initial induction period where the MO molecules are adsorbed on the surface of the clusters.
